# Supplementary material
Source: HighWire-hosted journal article supplement (https://bmjopen.bmj.com/content/15/1/e085956)
Supplement: inline-supplementary-material-2 [file inline-supplementary-material-2.pdf]

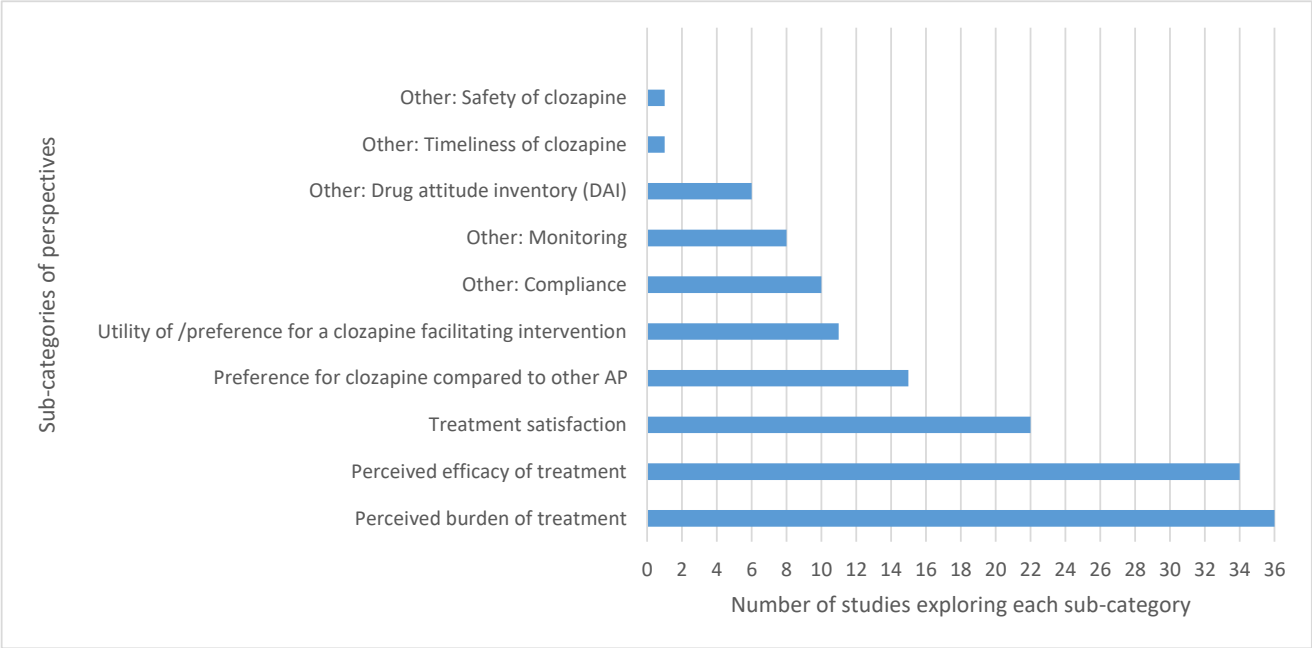

Figure S1.a. The distribution of explored sub-categories of perspectives in studies on patient perspectives on active/ongoing clozapine treatment (N= 45).

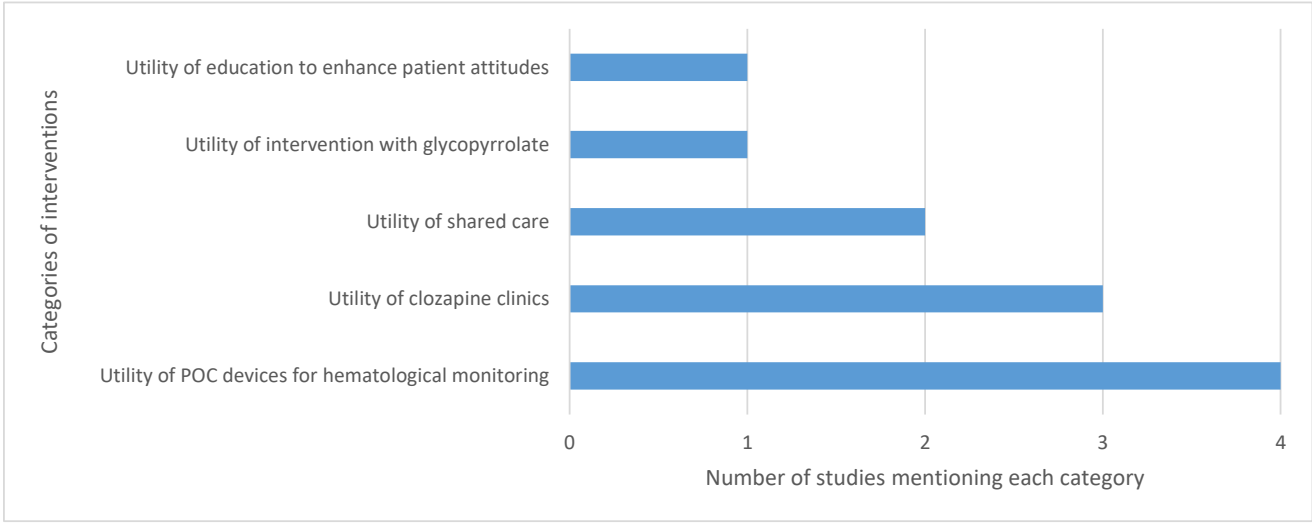

Figure S1.b. The distribution of interventions mentioned in studies reporting on patient perspectives on interventions related to active/ongoing clozapine treatment (N=11).
