# Supplementary material
Source: HighWire-hosted journal article supplement (https://bmjopen.bmj.com/content/15/1/e085956)
Supplement: inline-supplementary-material-3 [file inline-supplementary-material-3.pdf]

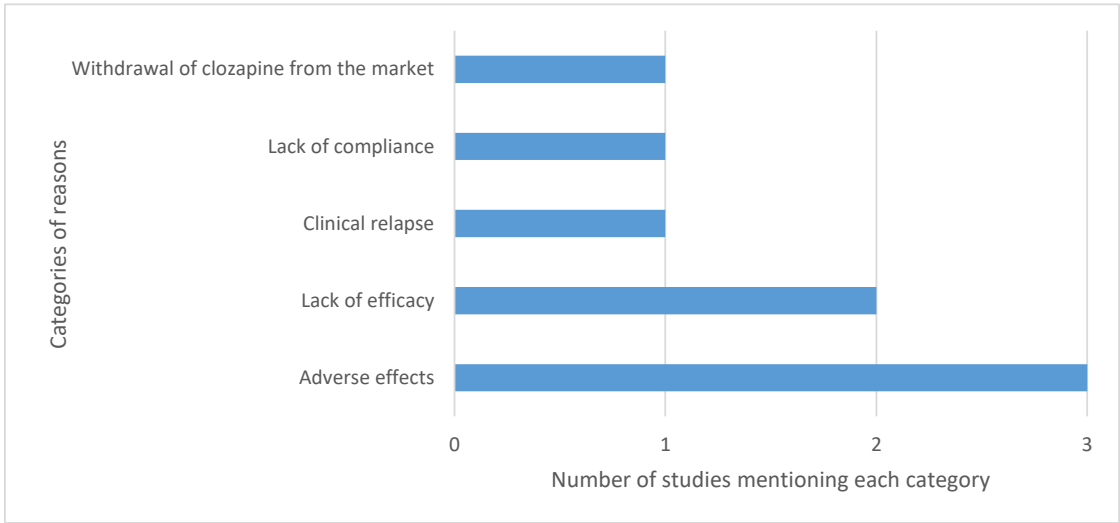

Figure S2. Distribution of categories of reasons for clozapine discontinuation mentioned in studies on patient perspectives on clozapine discontinuation (N=3).
