# Supplementary material
Source: HighWire-hosted journal article supplement (https://bmjopen.bmj.com/content/15/1/e085956)
Supplement: inline-supplementary-material-6 [file inline-supplementary-material-6.pdf]

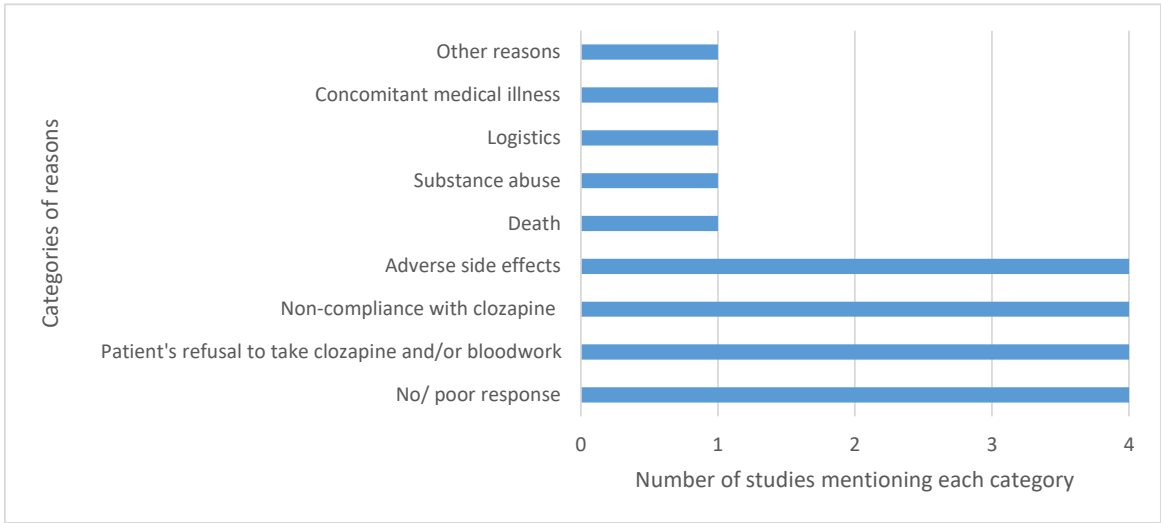

Figure S5. Distribution of categories of reasons for discontinuation mentioned in studies on clinician perspectives on clozapine discontinuation (N=5).
