# Supplementary material
Source: HighWire-hosted journal article supplement (https://bmjopen.bmj.com/content/15/1/e085956)
Supplement: inline-supplementary-material-7 [file inline-supplementary-material-7.pdf]

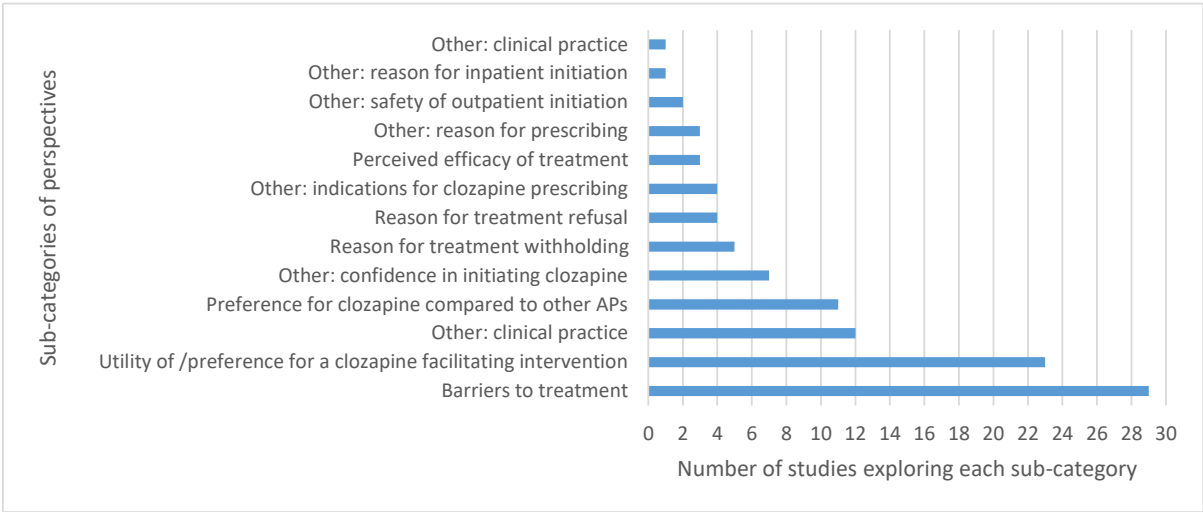

Figure S6.a. Distribution of explored sub-categories of perspectives in studies on clinician perspectives on clozapine initiation (N=46).

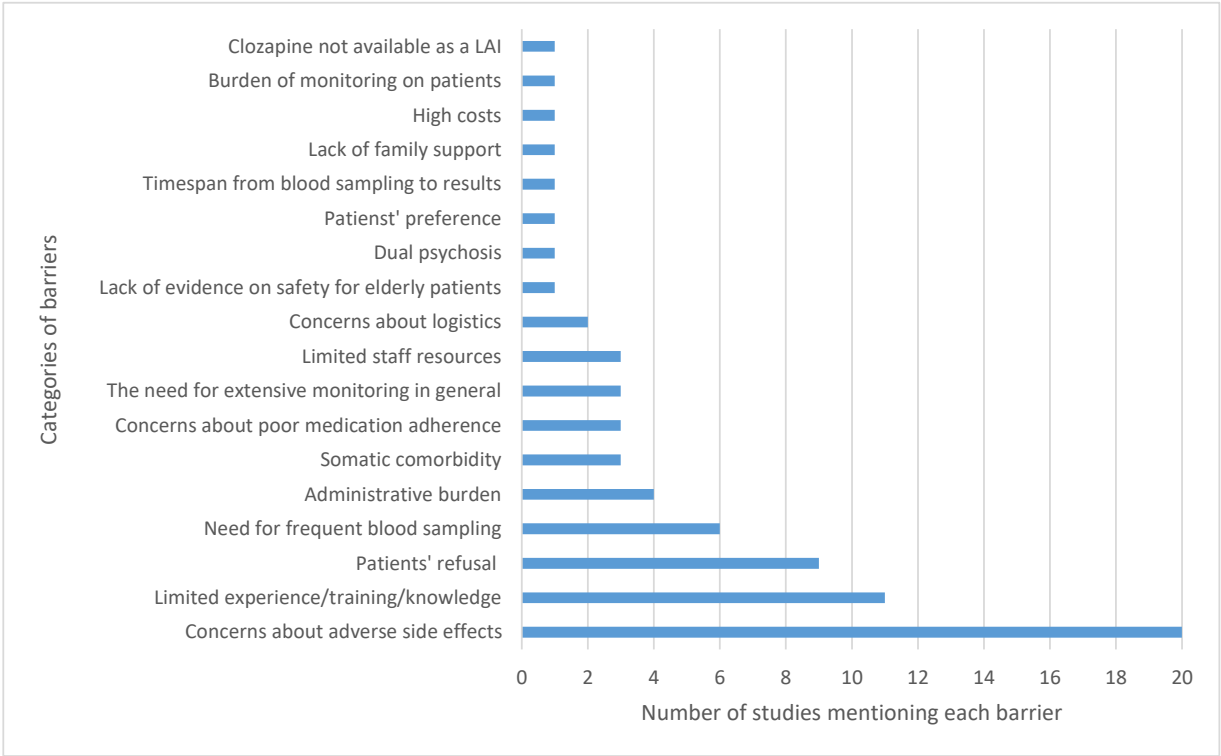

Figure 6.b. Distribution of barriers to clozapine initiation mentioned in studies reporting on clinician perspectives on barriers to clozapine initiation (N=29).

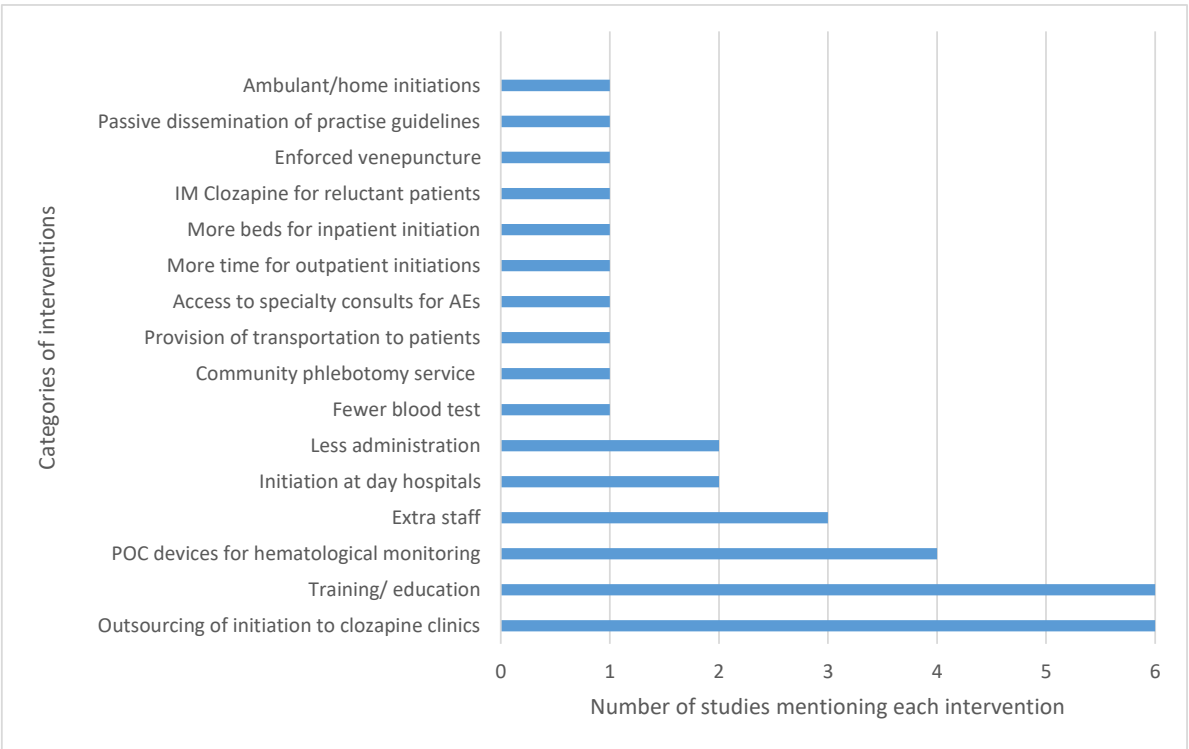

Figure S6.c. Distribution of clozapine-facilitating interventions mentioned in studies reporting on clinician perspectives on interventions related to clozapine initiation (N=23).

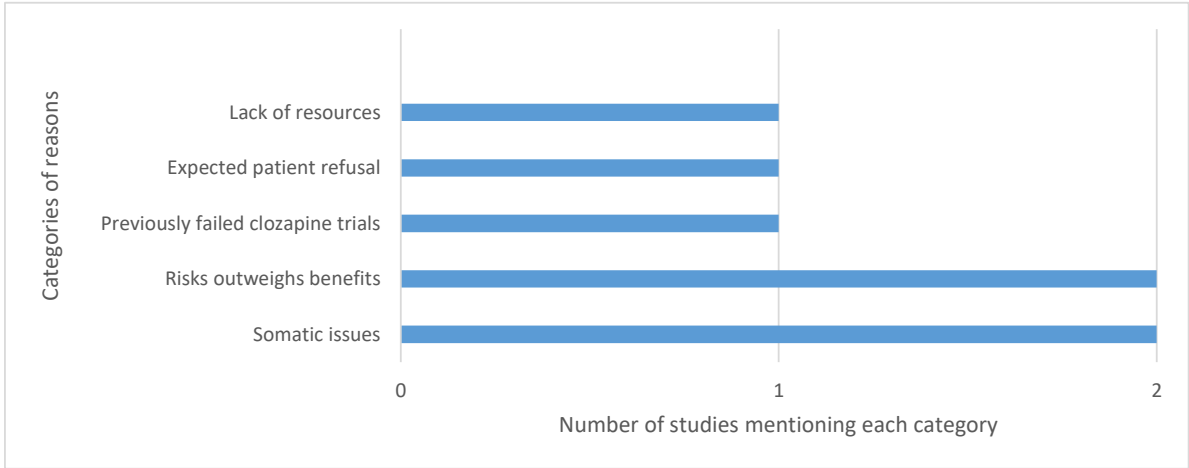

Figure S6.d. Distribution of reasons mentioned in studies reporting on clinicians' reasons for treatment withholding (N=5).
